# Supplementary material for: Amphoteric reactivity of a putative Cu(ii)-mCPBA intermediate
Source: Royal Society of Chemistry journal article supplement (doi:10.1039/d3dt03747a), 2024-01-01
Supplement: d3dt03747a1.pdf [file d3dt03747a1.pdf]

**Supporting online information for**

**Amphoteric reactivity of a putative Cu(II)-*m*CPBA intermediate‡**

Rakesh Kumar, Anweshika Maji, Bhargab Biswas, and Apparao Draksharapu\*

Southern Laboratories - 208A, Department of Chemistry, Indian Institute of Technology Kanpur,  
Kanpur-208016 (India).  
appud@iitk.ac.in

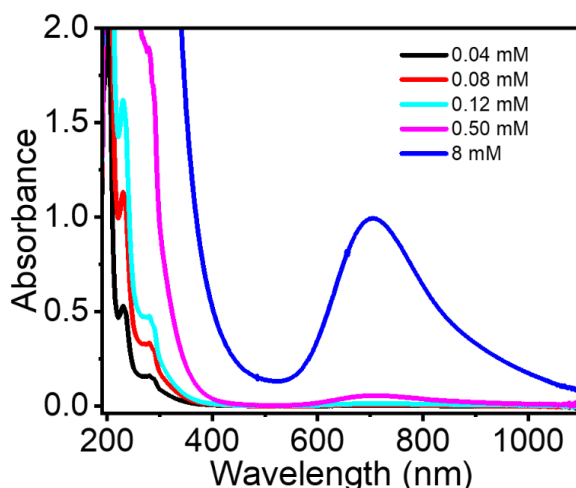

**Figure S1:** UV/Vis absorption spectra at different concentration (black) 0.04 mM, (red) 0.08 mM, (cyan) 0.12 mM, (magenta) 0.50 mM, and (blue) 8 mM of **1**.

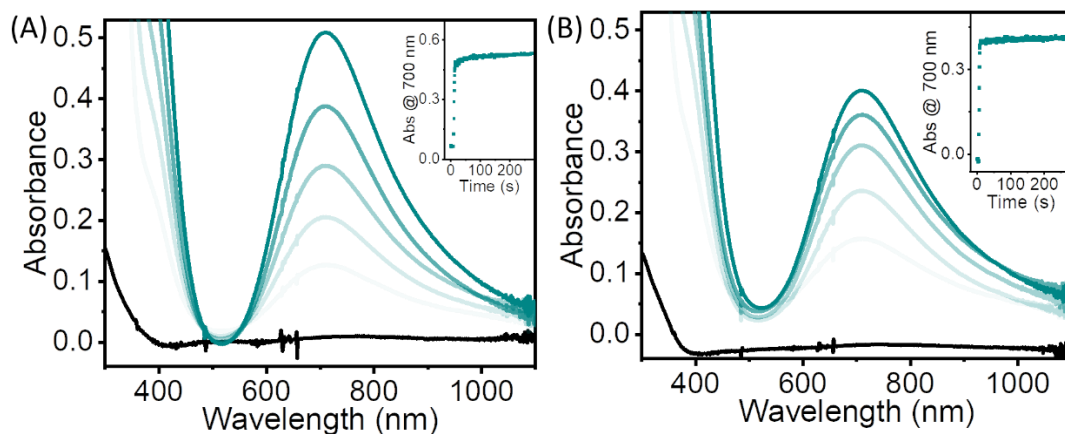

**Figure S2:** UV/Vis absorption changes upon reaction of (A) 3 equivalents and (B) 10 equivalents of *m*CPBA with 8 mM  $[\text{Cu}^{\text{I}}(\text{NCCH}_3)_4](\text{ClO}_4)$  in  $\text{CH}_3\text{CN}$  at 25 °C. Inset: The corresponding changes in the absorption at 700 nm over time in seconds.

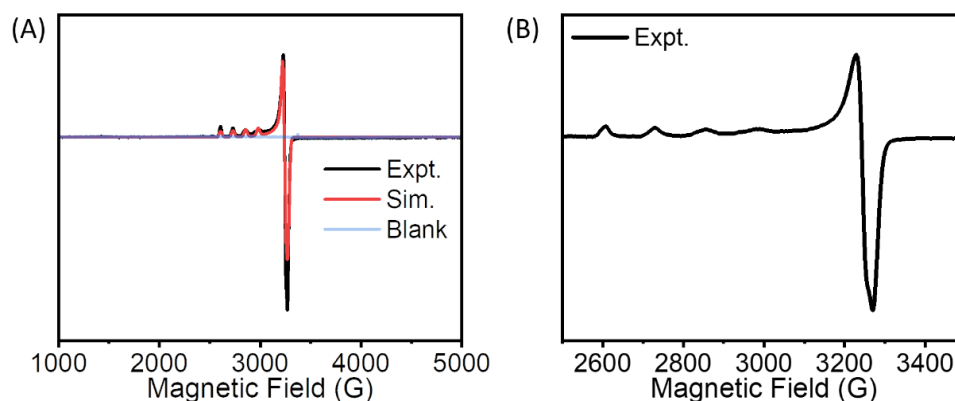

**Figure S3:** (A) Experimental (black) and simulated (red) X-band EPR spectra of **1** ( $g_x = g_y = 2.08$ ,  $g_z = 2.41$ ;  $A_x = A_y = 0$  G,  $A_z = 130$  G), and (blue)  $[\text{Cu}^{\text{I}}(\text{NCCH}_3)_4](\text{ClO}_4)$  (B) Zoomed in experimental spectrum of **1** measured at 120 K; modulation amplitude 2.08 G; modulation frequency 100 kHz, and attenuation 20 dB. Condition to generate **1**: 2 mM  $[\text{Cu}^{\text{I}}(\text{NCCH}_3)_4](\text{ClO}_4)$  in  $\text{CH}_3\text{CN}$  treated with 1 eq. of *m*CPBA at 25 °C.

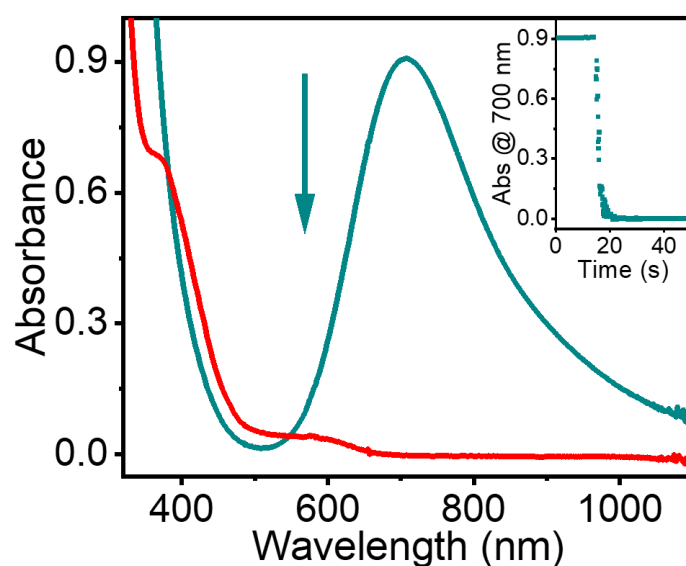

**Figure S4:** UV/Vis absorption changes depicting the reaction of 8 mM **1** with 20 eq. of *p*-cresol at 25 °C. Inset: The corresponding changes in the absorption at 700 nm over time in seconds. Conditions to generate **1**: 8 mM  $[\text{Cu}'(\text{NCCH}_3)_4](\text{ClO}_4)$  in  $\text{CH}_3\text{CN}$  + 1 eq. of *m*CPBA at 25 °C.

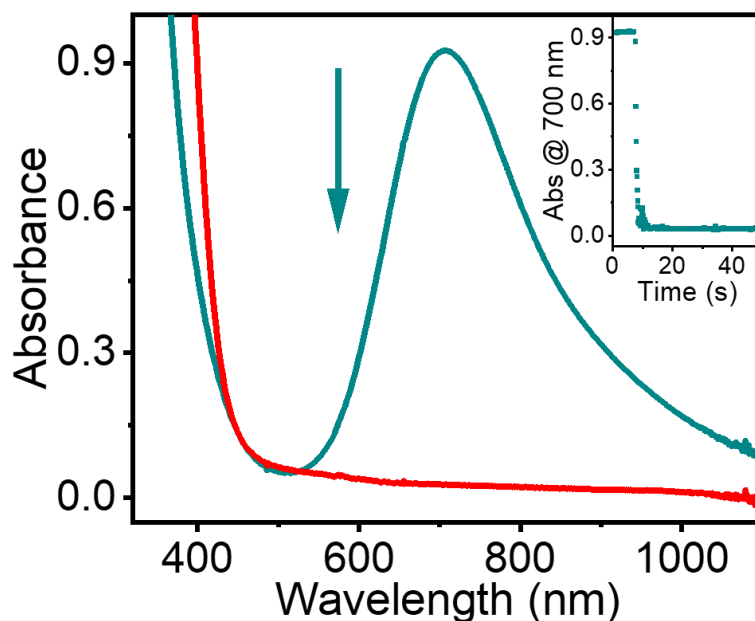

**Figure S5:** UV/Vis absorption changes depicting the reaction of 8 mM **1** with 20 eq. of *p*-fluorophenol at 25 °C. Inset: The corresponding changes in the absorption at 700 nm over time in seconds. Conditions to generate **1**: 8 mM  $[\text{Cu}'(\text{NCCH}_3)_4](\text{ClO}_4)$  in  $\text{CH}_3\text{CN}$  + 1 eq. of *m*CPBA at 25 °C.

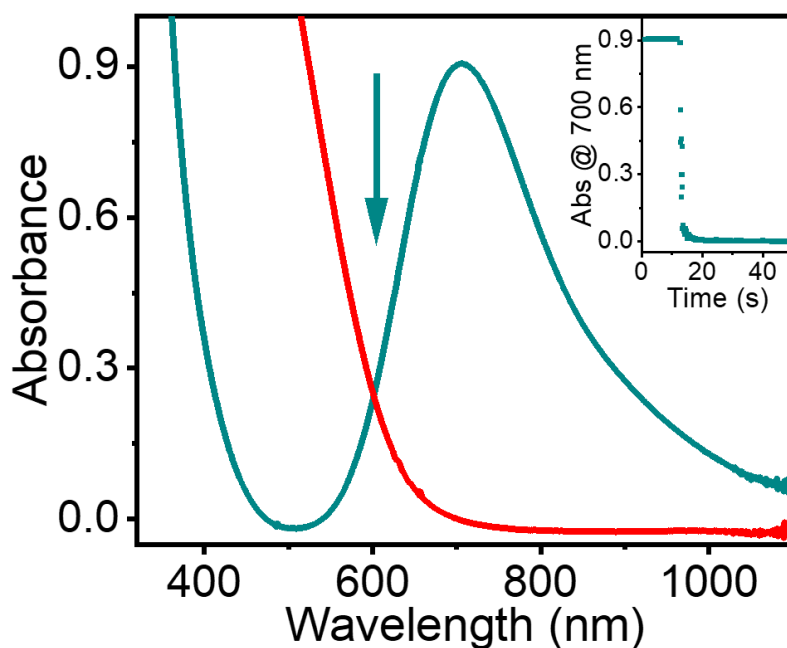

**Figure S6:** UV/Vis absorption changes depicting the reaction of 8 mM **1** with 20 eq. of phenol at 25 °C. Inset: The corresponding changes in the absorption at 700 nm over time in seconds. *Conditions to generate **1**: 8 mM [Cu<sup>I</sup>(NCCH<sub>3</sub>)<sub>4</sub>](ClO<sub>4</sub>) in CH<sub>3</sub>CN + 1 eq. of mCPBA at 25 °C.*

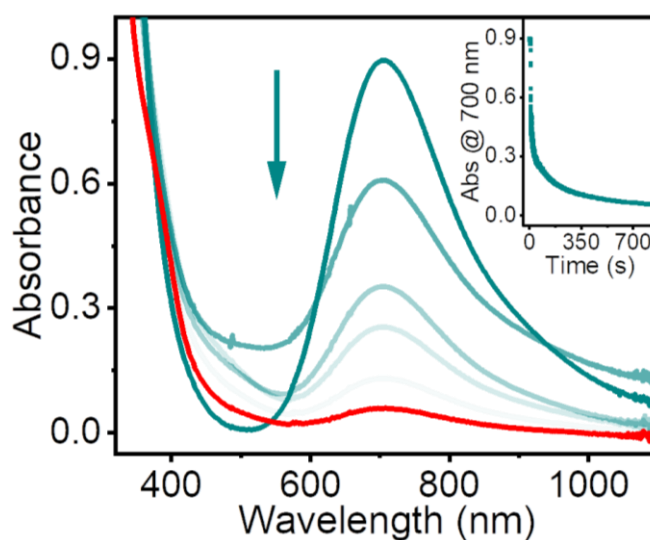

**Figure S7:** UV/Vis absorption changes depicting the reaction of 8 mM **1** with 20 eq. of *p*-hydroxybenzointrile at 25 °C. Inset: The corresponding changes in the absorption at 700 nm over time in seconds. *Conditions to generate **1**: 8 mM [Cu<sup>I</sup>(NCCH<sub>3</sub>)<sub>4</sub>](ClO<sub>4</sub>) in CH<sub>3</sub>CN + 1 eq. of mCPBA at 25 °C.*

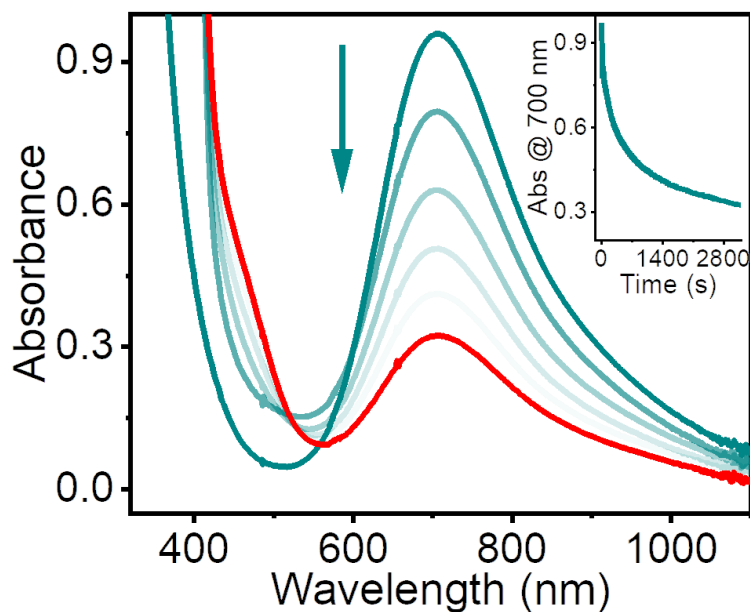

**Figure S8:** UV/Vis absorption changes depicting the reaction of 8 mM **1** with 20 eq. of *p*-nitrophenol at 25 °C. Inset: The corresponding changes in the absorption at 700 nm over time in seconds. Conditions to generate **1**: 8 mM  $[\text{Cu}^{\text{I}}(\text{NCCH}_3)_4](\text{ClO}_4)$  in  $\text{CH}_3\text{CN}$  + 1 eq. of *m*CPBA at 25 °C.

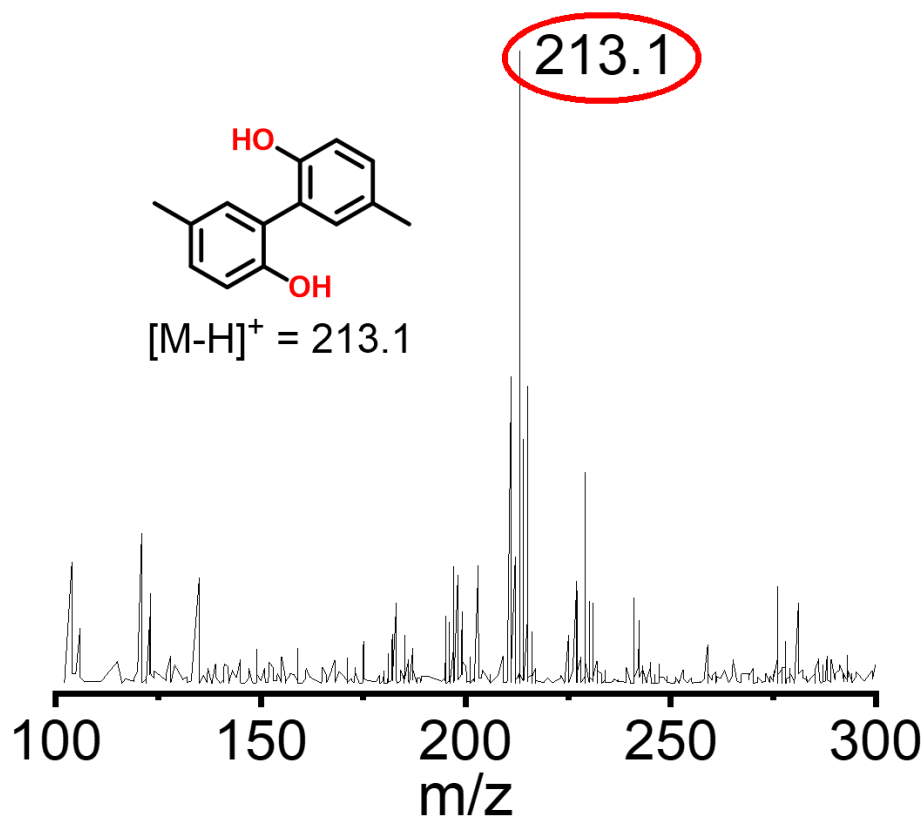

**Figure S9:** Product analysis of the reaction of **1** with 2 eq. of *p*-cresol by ESI-MS. Conditions to generate **1**: 20 mM  $[\text{Cu}^{\text{I}}(\text{NCCH}_3)_4](\text{ClO}_4)$  in  $\text{CH}_3\text{CN}$  + 1 eq. *m*CPBA at 25 °C.

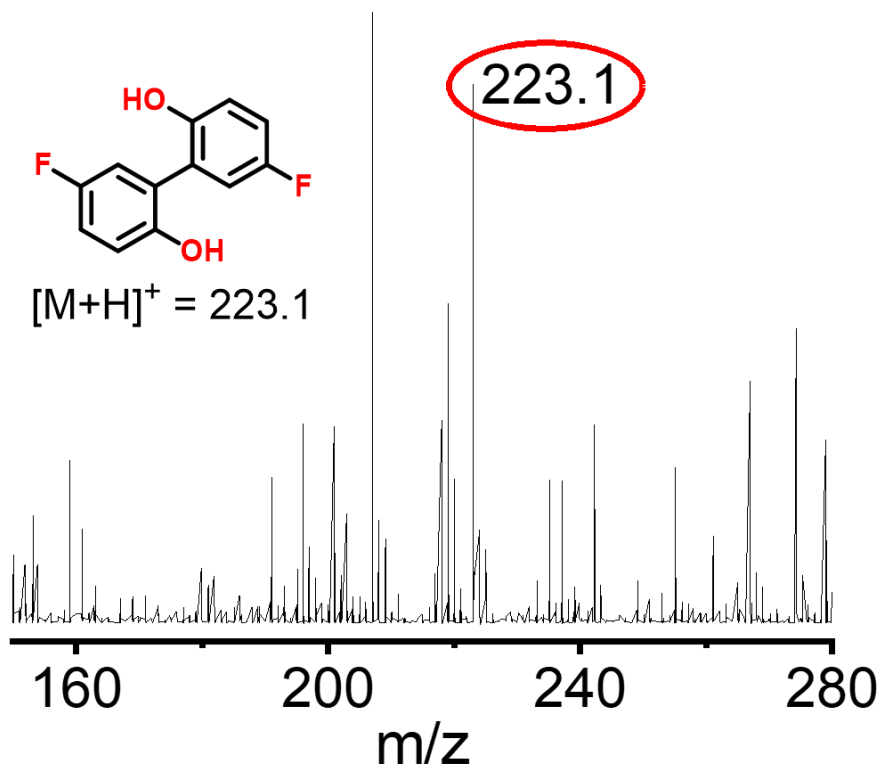

**Figure S10:** Product analysis of the reaction of **1** with 2 eq. of *p*-fluorophenol by ESI-MS. Conditions to generate **1**: 20 mM  $[Cu^I(NCCH_3)_4](ClO_4)$  in  $CH_3CN$  + 1 eq. *m*CPBA at 25 °C.

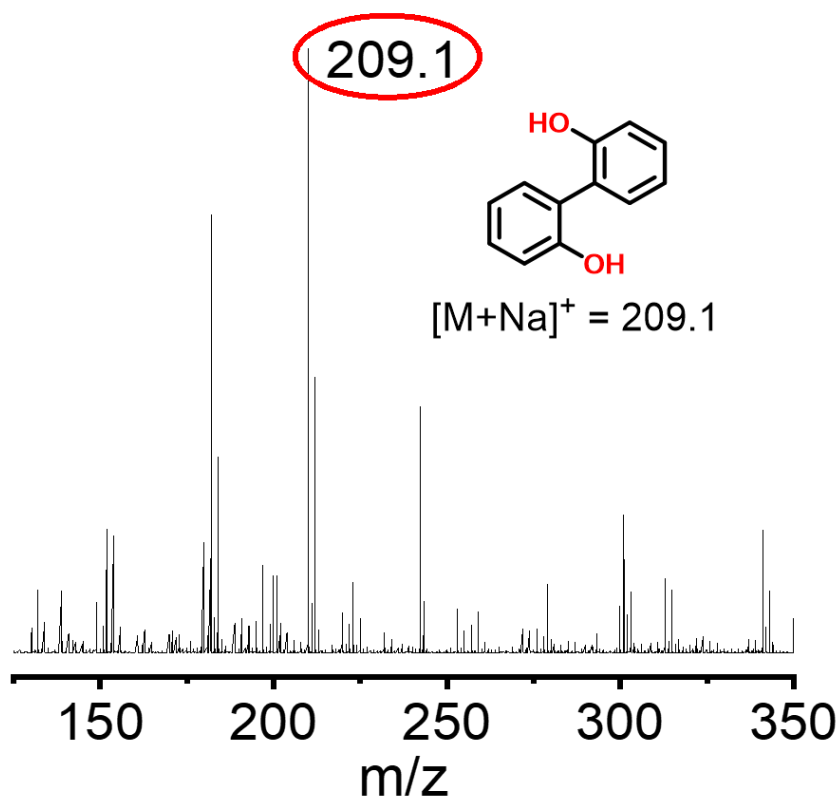

**Figure S11:** Product analysis of the reaction of **1** with 2 eq. of phenol by ESI-MS. Conditions to generate **1**: 20 mM  $[Cu^I(NCCH_3)_4](ClO_4)$  in  $CH_3CN$  + 1 eq. *m*CPBA at 25 °C.

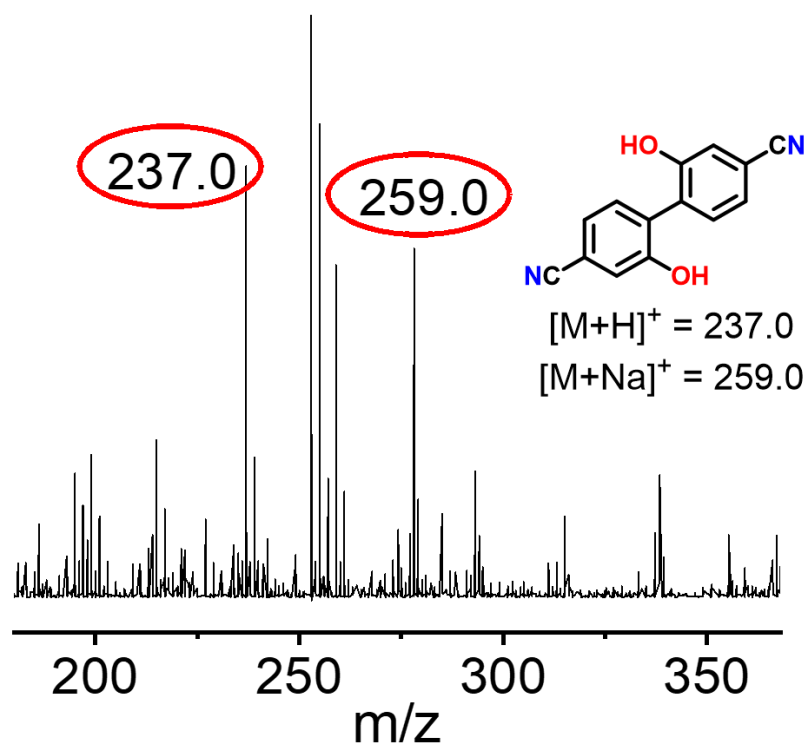

**Figure S12:** Product analysis of the reaction of **1** with 2 eq. of *p*-hydroxybenzonitrile by ESI-MS. Conditions to generate **1**: 20 mM  $[Cu^I(NCCH_3)_4](ClO_4)$  in  $CH_3CN$  + 1 eq. *m*CPBA at 25 °C.

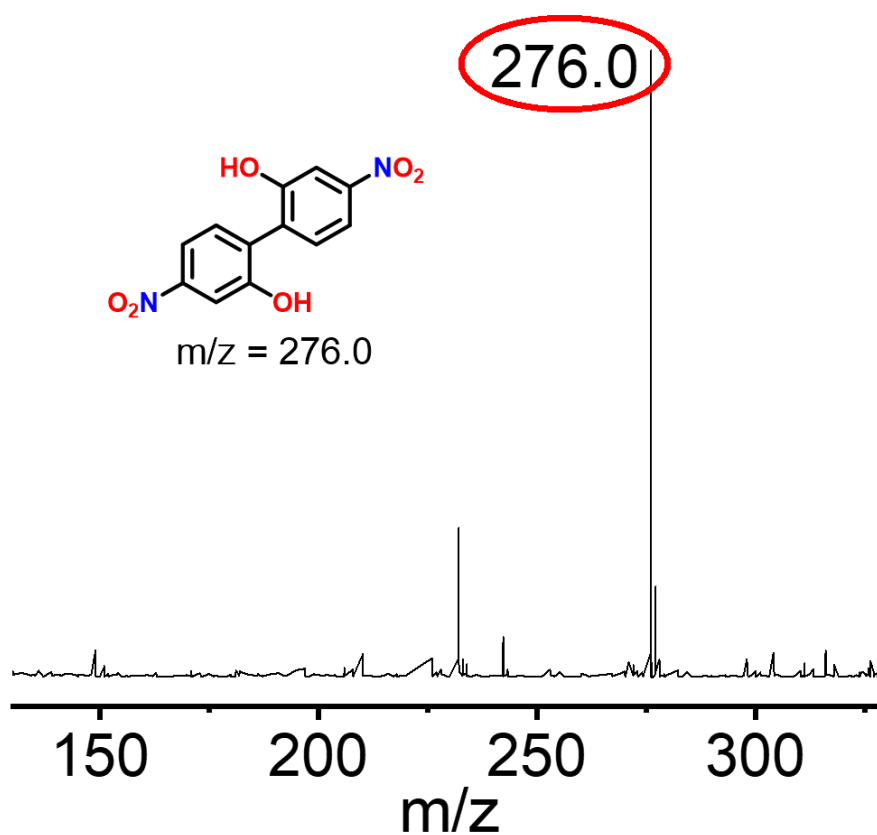

**Figure S13:** Product analysis of the reaction of **1** with 100 eq. of *p*-nitro phenol by ESI-MS. Conditions to generate **1**: 20 mM  $[Cu^I(NCCH_3)_4](ClO_4)$  in  $CH_3CN$  + 1 eq. *m*CPBA at 25 °C.

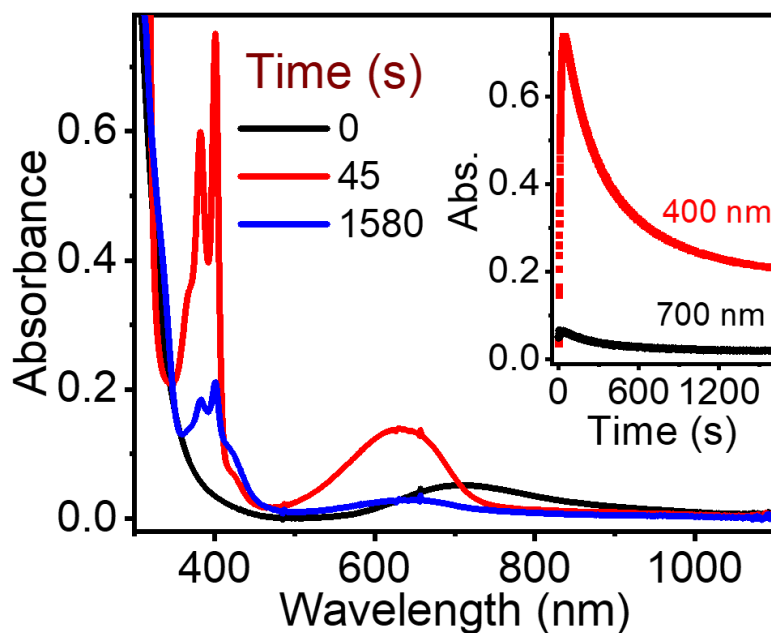

**Figure S14:** UV/Vis absorption changes depicting the reaction of 0.5 mM **1** with 2 eq. of 2,4,6-TTBP. Inset: The corresponding changes in the absorption at 400 nm (red) and 700 (black) nm over time in seconds. Conditions to generate **1**: 0.5 mM  $[\text{Cu}^{\text{I}}(\text{NCCH}_3)_4](\text{ClO}_4)$  in  $\text{CH}_3\text{CN}$  + 1 eq. of *m*CPBA at 25 °C.

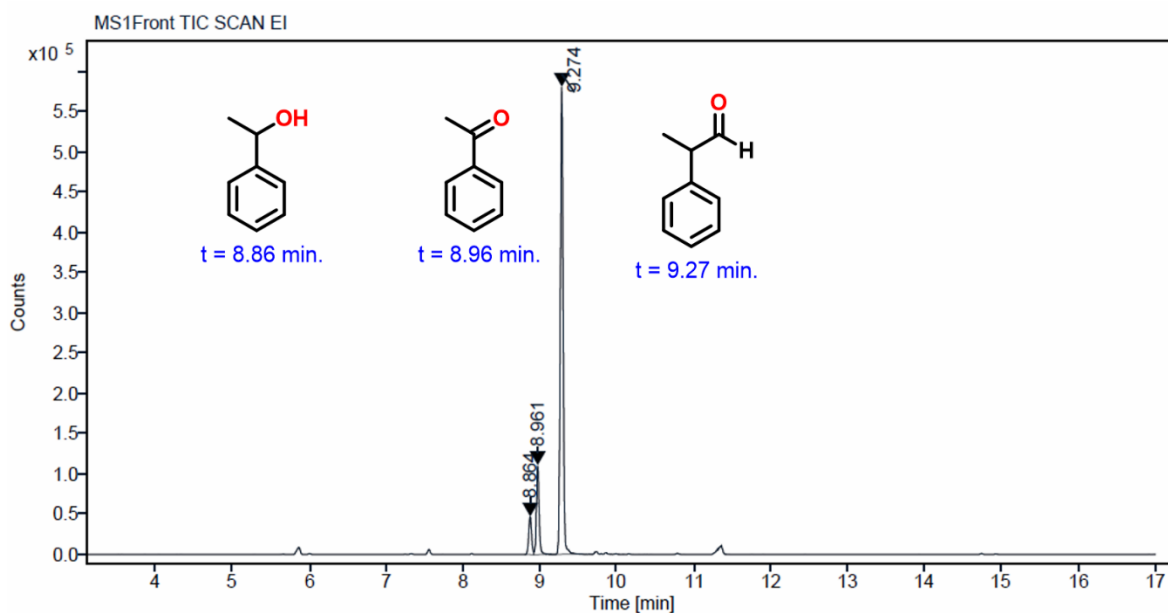

**Figure S15:** Gas Chromatogram of the reaction of **1** with 5 eq. of 2-PPA at 40 °C. Conditions to generate **1**: 20 mM  $[\text{Cu}^{\text{I}}(\text{NCCH}_3)_4](\text{ClO}_4)$  in  $\text{CH}_3\text{CN}$  + 1 eq. *m*CPBA at 25 °C.



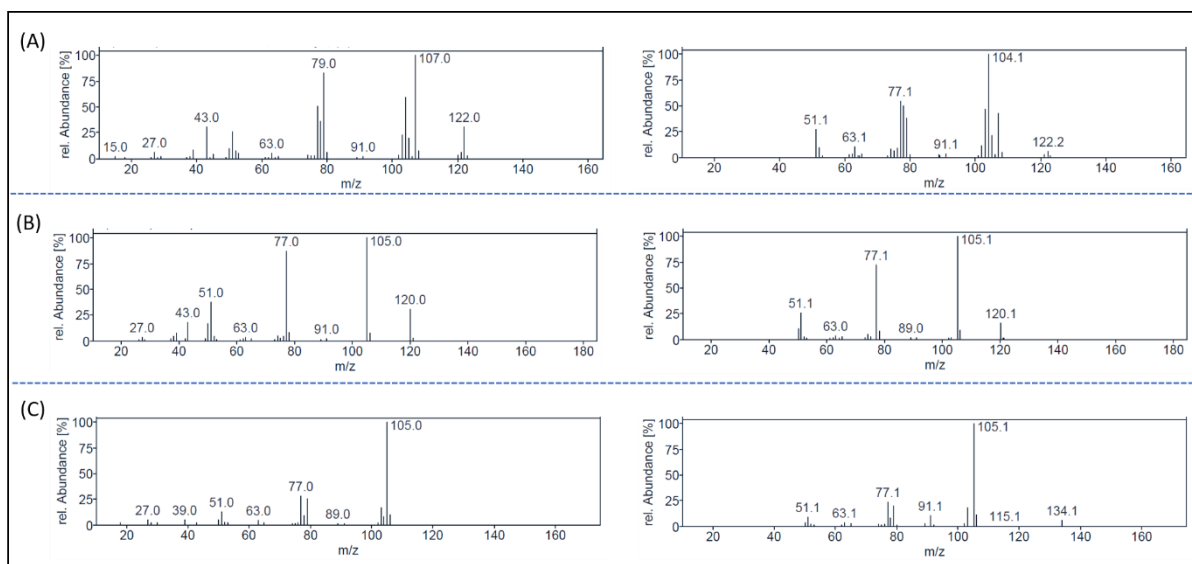

**Figure S16:** Product analysis of the reaction of **1** with 5 eq. of 2-PPA at 40 °C by GC followed by mass spectrometry. (Left) Experimental mass fragment data with peaks at corresponding retention time (in min.) (A) 8.862 min. for 1-phenylethanol (B) 8.959 min. for acetophenone, and (C) 9.274 min. for 2-PPA; (Right) simulated from the mass library of GCMS. Conditions to generate **1**: 20 mM  $[\text{Cu}^{\text{I}}(\text{NCCH}_3)_4](\text{ClO}_4)$  in  $\text{CH}_3\text{CN}$  + 1 eq. *m*CPBA at 25 °C.

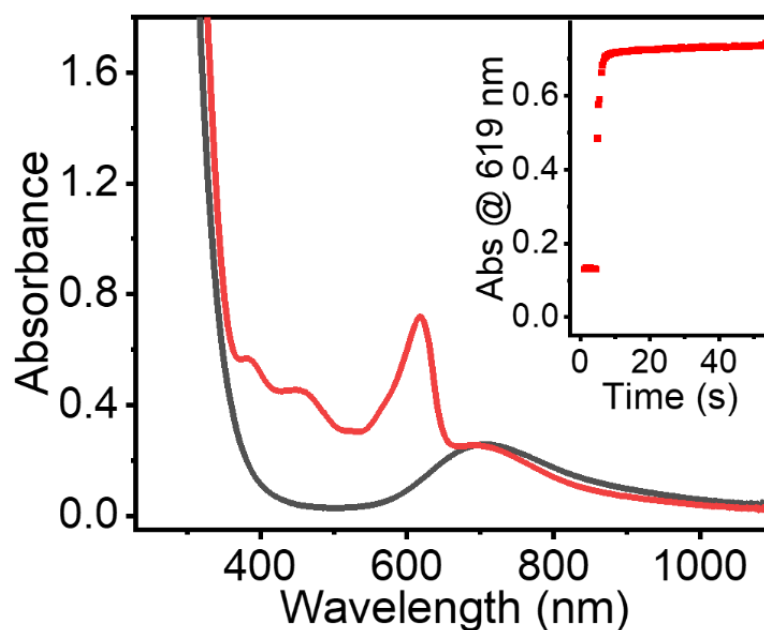

**Figure S17:** UV/Vis absorption changes depicting the reaction of 2 mM **1** with 2 eq. of ferrocene. Inset: The corresponding changes in the absorption at 619 nm due to ferrocenium ( $\text{Fc}^+$ ) over time in seconds. Conditions to generate **1**: 2 mM  $[\text{Cu}^{\text{I}}(\text{NCCH}_3)_4](\text{ClO}_4)$  in  $\text{CH}_3\text{CN}$  + 1 eq. of *m*CPBA at 25 °C.

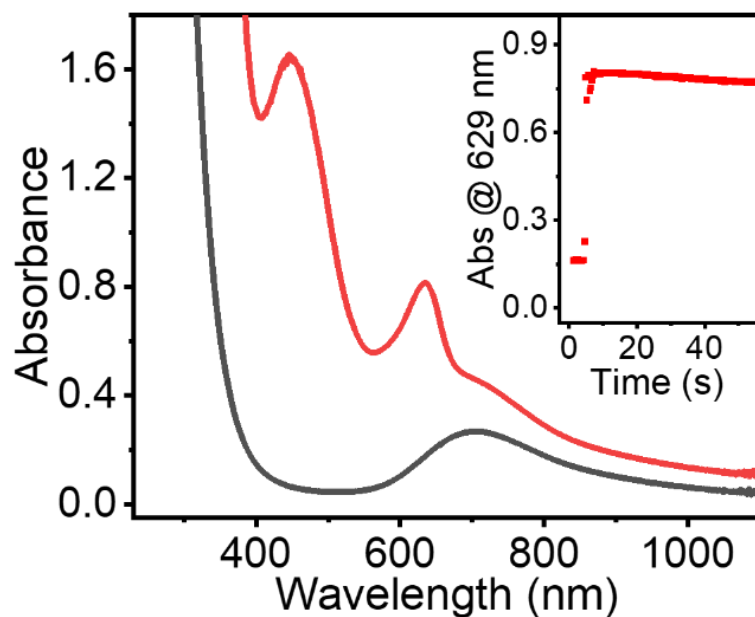

**Figure S18:** UV/Vis absorption changes depicting the reaction of 2 mM **1** with 2 eq. of acetylferrocene. Inset: The corresponding changes in the absorption at 629 nm due to acetylferrocenium ( $\text{AcFc}^+$ ) over time in seconds. *Conditions to generate 1: 2 mM  $[\text{Cu}^{\text{I}}(\text{NCCH}_3)_4](\text{ClO}_4)$  in  $\text{CH}_3\text{CN}$  + 1 eq. mCPBA at 25 °C.*

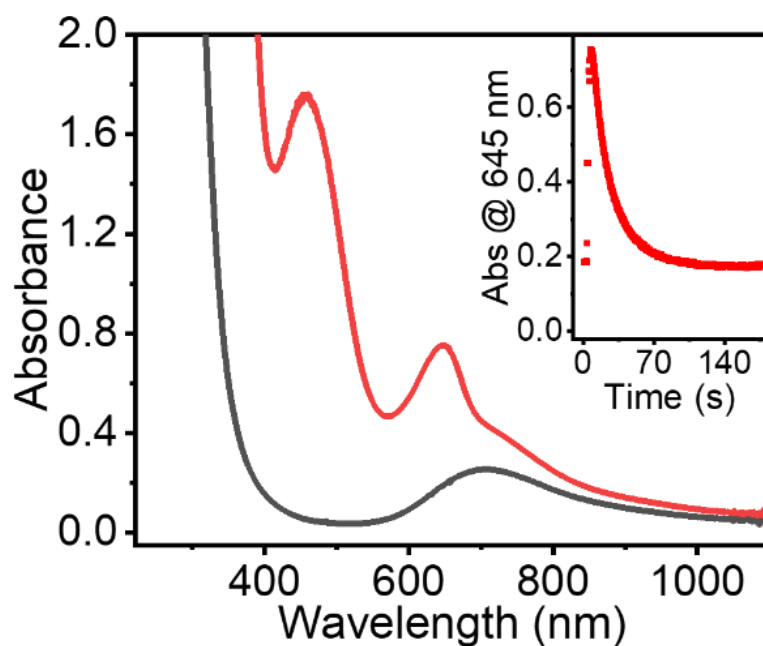

**Figure S19:** UV/Vis absorption changes depicting the reaction of 2 mM **1** with 2 eq. of diacetylferrocene. Inset: The corresponding changes in the absorption at 645 nm due to diacetylferrocenium ( $\text{Ac}_2\text{Fc}^+$ ) over time in seconds. *Conditions to generate 1: 2 mM  $[\text{Cu}^{\text{I}}(\text{NCCH}_3)_4](\text{ClO}_4)$  in  $\text{CH}_3\text{CN}$  + 1 eq. mCPBA at 25 °C.*

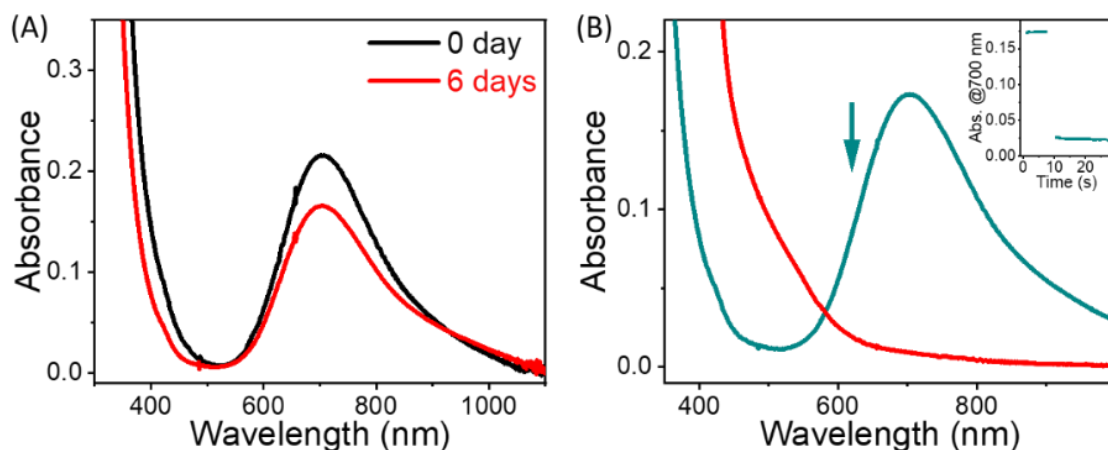

**Figure S20:** UV/Vis absorption changes depicting the (A) decay of **1**: (black) initial spectra and (red) after 6 days. (B) the instantaneous decay of **1** (solution kept for 6 days) upon addition of 20 eq. of phenol. Inset: The corresponding changes in the absorbance at 700 nm over time in seconds. Conditions to generate **1**: 2 mM  $[\text{Cu}^{\text{I}}(\text{NCCH}_3)_4](\text{ClO}_4)$  in  $\text{CH}_3\text{CN}$  + 1 eq. of *m*CPBA at 25 °C.

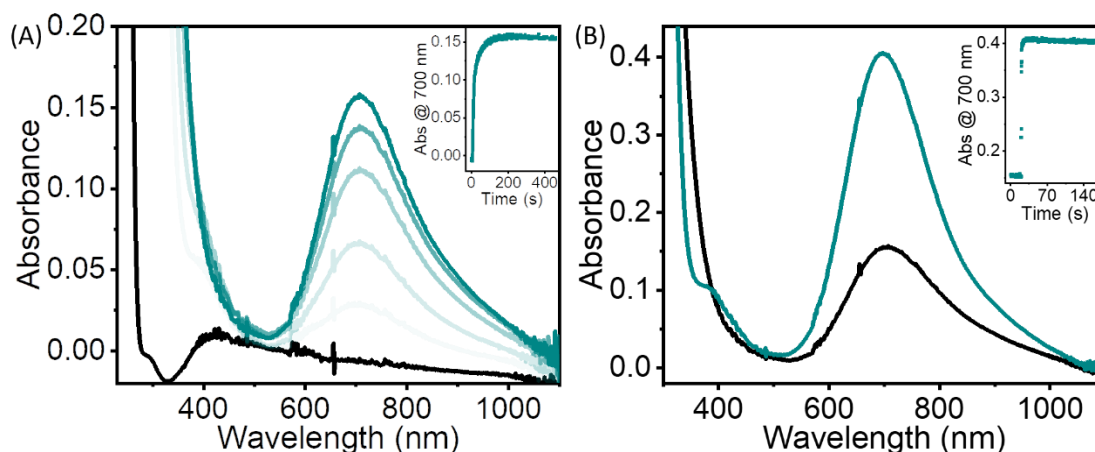

**Figure S21:** UV/Vis absorption changes depicting the reaction of (A) 2 mM  $[\text{Cu}^{\text{I}}(\text{NCCH}_3)_4](\text{ClO}_4)$  with 0.5 eq. of *m*CPBA at 25 °C. Inset: The corresponding changes in the absorption at 700 nm over time in seconds. (B) In continuation, to this 1.5 eq. of *m*CBA and 1.5 eq. of  $\text{Et}_3\text{N}$  (as a source of 3-chlorobenzoate) added. Inset: The corresponding changes in the absorption at 700 nm over time in seconds.

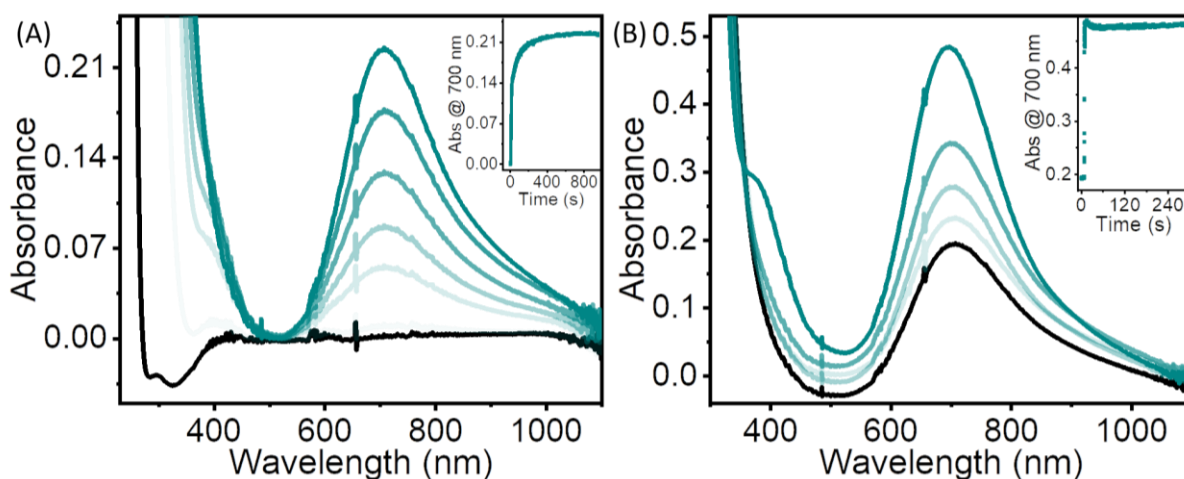

**Figure S22:** UV/Vis absorption changes depicting the reaction of (A) 2 mM  $[\text{Cu}^{\text{I}}(\text{NCCH}_3)_4](\text{ClO}_4)$  with 1 eq. of mCPBA at 25 °C. Inset: The corresponding changes in the absorption at 700 nm over time in seconds. (B) In continuation, to this 1 eq. of mCBA and 1 eq. of  $\text{Et}_3\text{N}$  (as a source of 3-chlorobenzoate) added. Inset: The corresponding changes in the absorption at 700 nm over time in seconds.

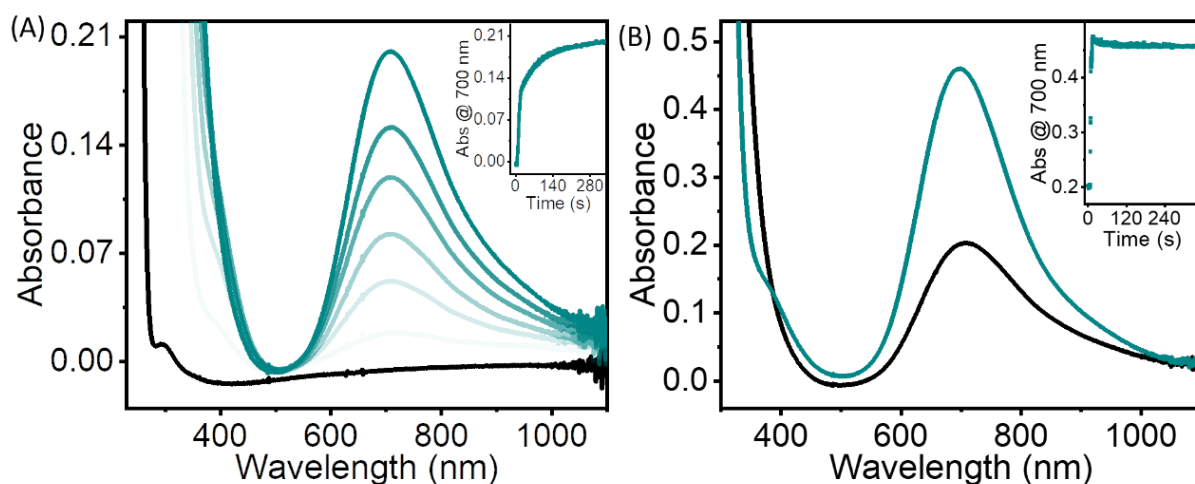

**Figure S23:** UV/Vis absorption changes depicting the reaction of (A) 2 mM  $[\text{Cu}^{\text{I}}(\text{NCCH}_3)_4](\text{ClO}_4)$  with 1.5 eq. of mCPBA at 25 °C. Inset: The corresponding changes in the absorption at 700 nm over time in seconds. (B) In continuation, to this 1.5 eq. of mCBA and 1.5 eq. of  $\text{Et}_3\text{N}$  (as a source of 3-chlorobenzoate) added. Inset: The corresponding changes in the absorption at 700 nm over time in seconds.

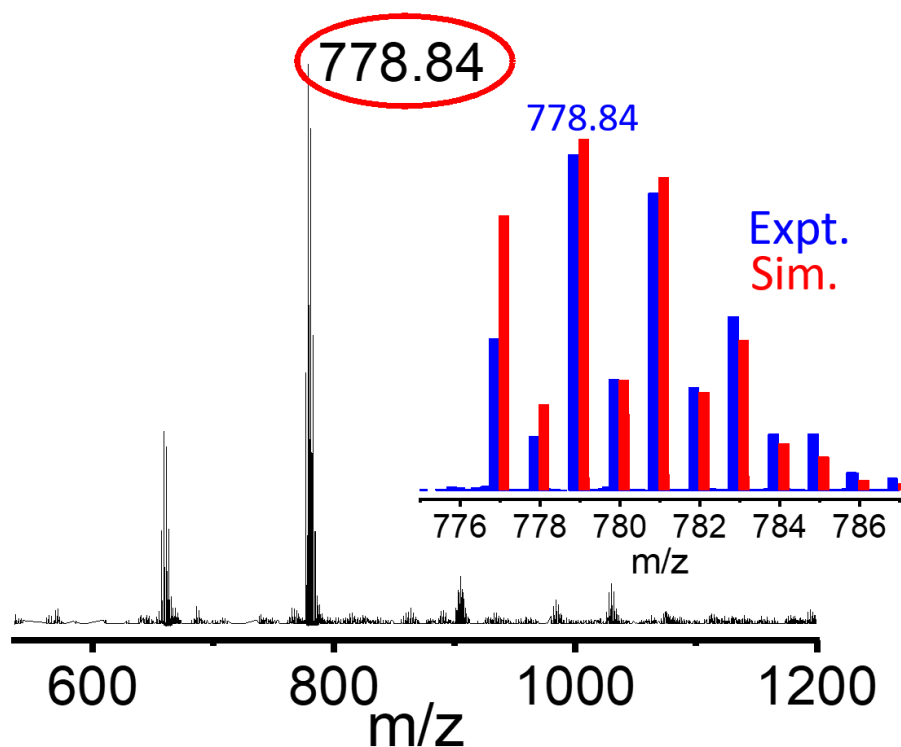

**Figure S24:** Negative mode ESI-mass spectrum of **2** in CH<sub>3</sub>CN.

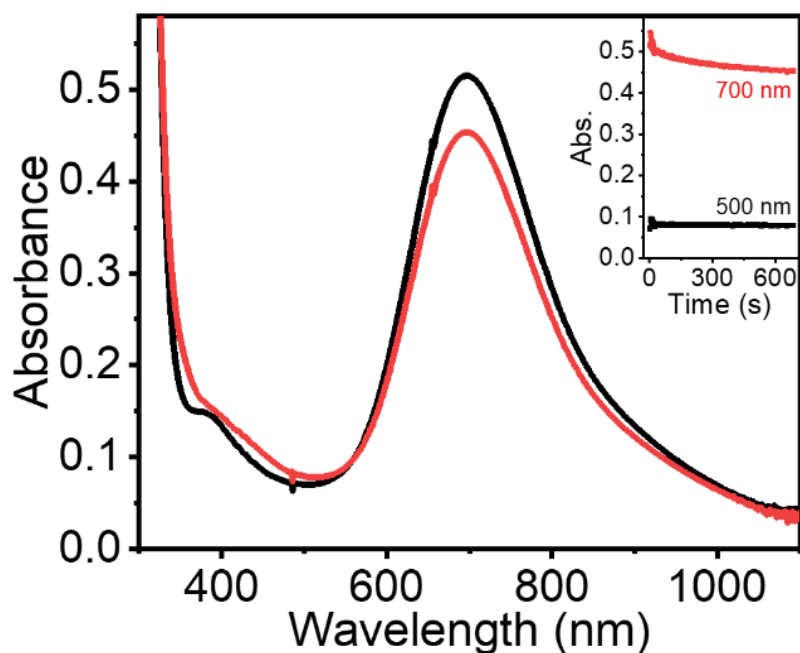

**Figure S25:** UV/Vis absorption changes depicting the reaction of 2 mM **2** (black) with 10 eq. of *p*-cresol. (red) Spectra recorded after 600 sec. of reactant added. Inset: The corresponding changes in the absorption at 700 nm and 500 nm over time in seconds. *Conditions to generate 2:* 2 mM [Cu<sup>I</sup>(NCCH<sub>3</sub>)<sub>4</sub>](ClO<sub>4</sub>) + 0.5 eq. of *m*CPBA + 1.5 eq. of (*m*CBA + Et<sub>3</sub>N) in CH<sub>3</sub>CN at 25 °C.

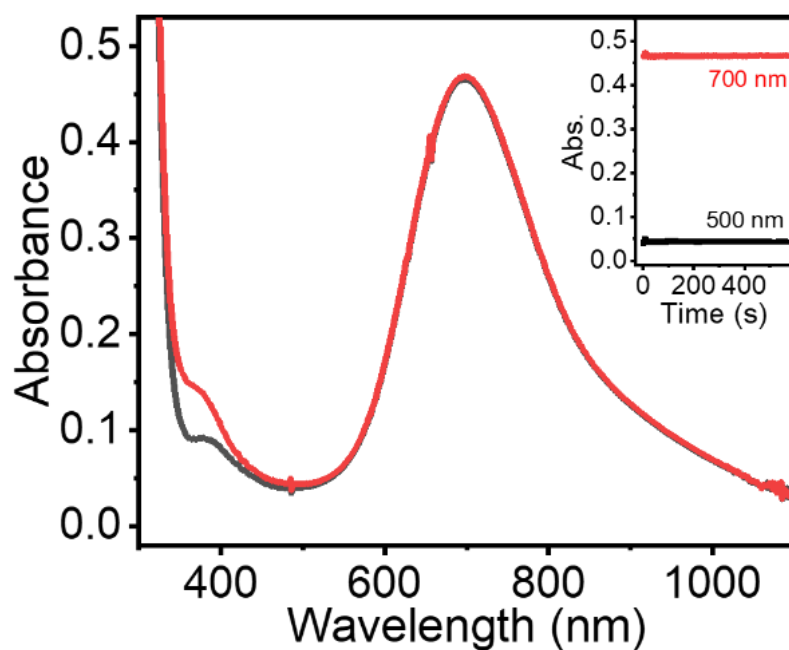

**Figure S26:** UV/Vis absorption changes depicting the reaction of 2 mM **2** (black) with 10 eq. of *p*-fluorophenol. (red) Spectra recorded after 500 sec. of reactant added. Inset: The corresponding changes in the absorption at 700 nm and 500 nm over time in seconds. *Conditions to generate 2:* 2 mM  $[\text{Cu}^{\text{I}}(\text{NCCH}_3)_4](\text{ClO}_4)$  + 0.5 eq. of *m*CPBA + 1.5 eq. of (*m*CBA +  $\text{Et}_3\text{N}$ ) in  $\text{CH}_3\text{CN}$  at 25 °C.

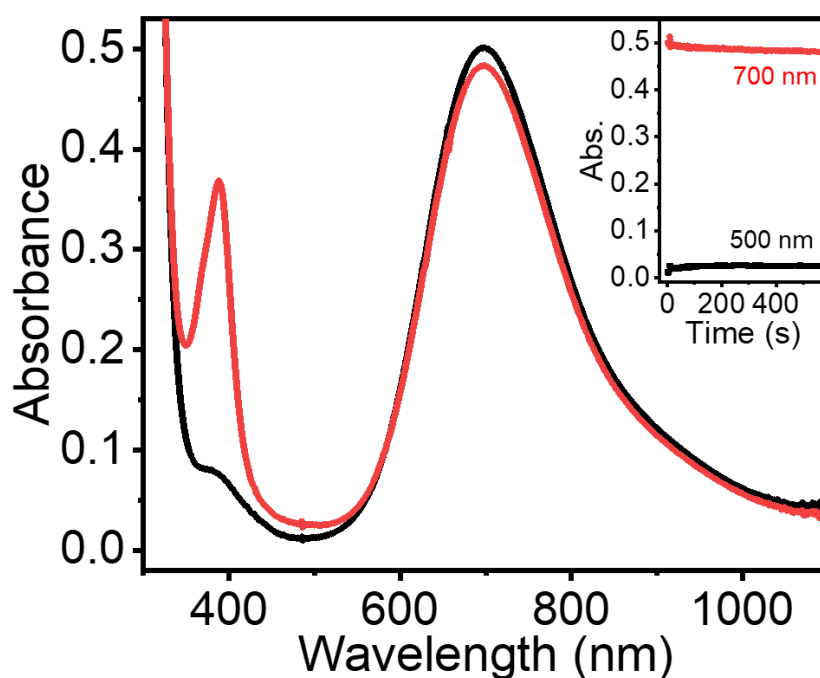

**Figure S27:** UV/Vis absorption changes depicting the reaction of 2 mM **2** (black) with 10 eq. of phenol. (red) Spectra recorded after 500 sec. of reactant added. Inset: The corresponding changes in the absorption at 700 nm and 500 nm over time in seconds. *Conditions to generate 2:* 2 mM  $[\text{Cu}^{\text{I}}(\text{NCCH}_3)_4](\text{ClO}_4)$  + 0.5 eq. of *m*CPBA + 1.5 eq. of (*m*CBA +  $\text{Et}_3\text{N}$ ) in  $\text{CH}_3\text{CN}$  at 25 °C.

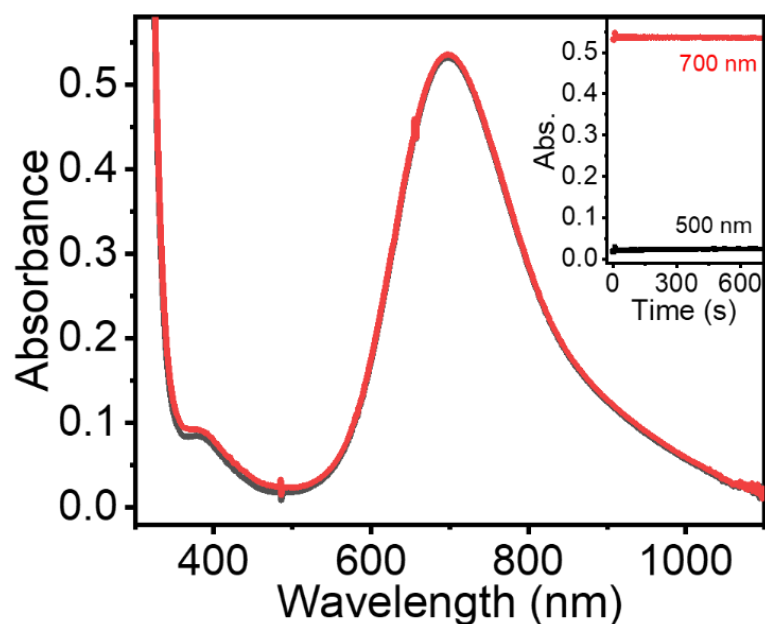

**Figure S28:** UV/Vis absorption changes depicting the reaction of 2 mM **2** (black) with 10 eq. of *p*-hydroxybenzointrile. (red) Spectra recorded after 600 sec. of reactant added. Inset: The corresponding changes in the absorption at 700 nm and 500 nm over time in seconds. Conditions to generate **2**: 2 mM  $[\text{Cu}^{\text{I}}(\text{NCCH}_3)_4](\text{ClO}_4)$  + 0.5 eq. of *m*CPBA + 1.5 eq. of (*m*CBA +  $\text{Et}_3\text{N}$ ) in  $\text{CH}_3\text{CN}$  at 25 °C.

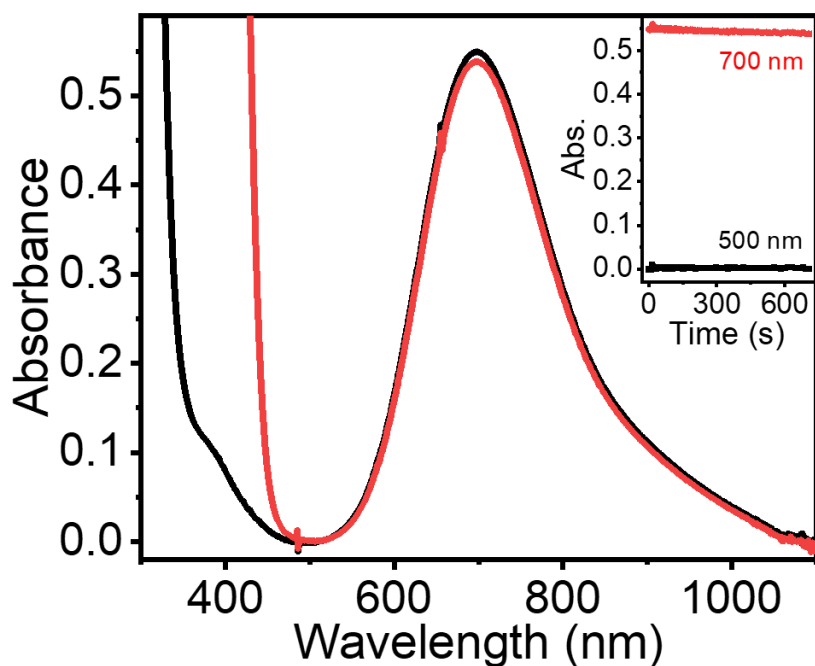

**Figure S29:** UV/Vis absorption changes depicting the reaction of 2 mM **2** (black) with 10 eq. of *p*-nitrophenol. (red) Spectra recorded after 600 sec. of reactant added. Inset: The corresponding changes in the absorption at 700 nm and 500 nm over time in seconds. Conditions to generate **2**: 2 mM  $[\text{Cu}^{\text{I}}(\text{NCCH}_3)_4](\text{ClO}_4)$  + 0.5 eq. of *m*CPBA + 1.5 eq. of (*m*CBA +  $\text{Et}_3\text{N}$ ) in  $\text{CH}_3\text{CN}$  at 25 °C.

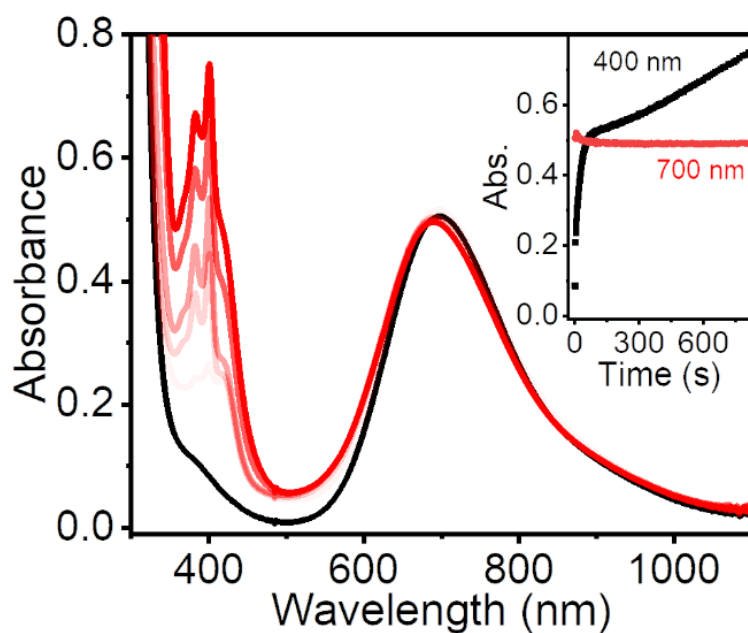

**Figure S30:** UV/Vis absorption changes depicting the reaction of 2 mM **2** with 2 eq. of 2,4,6-TTBP. Inset: The corresponding changes in the absorption at 700 nm and 400 nm over time in seconds. Conditions to generate **2**: 2 mM  $[\text{Cu}^{\text{I}}(\text{NCCH}_3)_4](\text{ClO}_4)$  + 0.5 eq. of mCPBA + 1.5 eq. of (mCBA +  $\text{Et}_3\text{N}$ ) in  $\text{CH}_3\text{CN}$  at 25 °C.

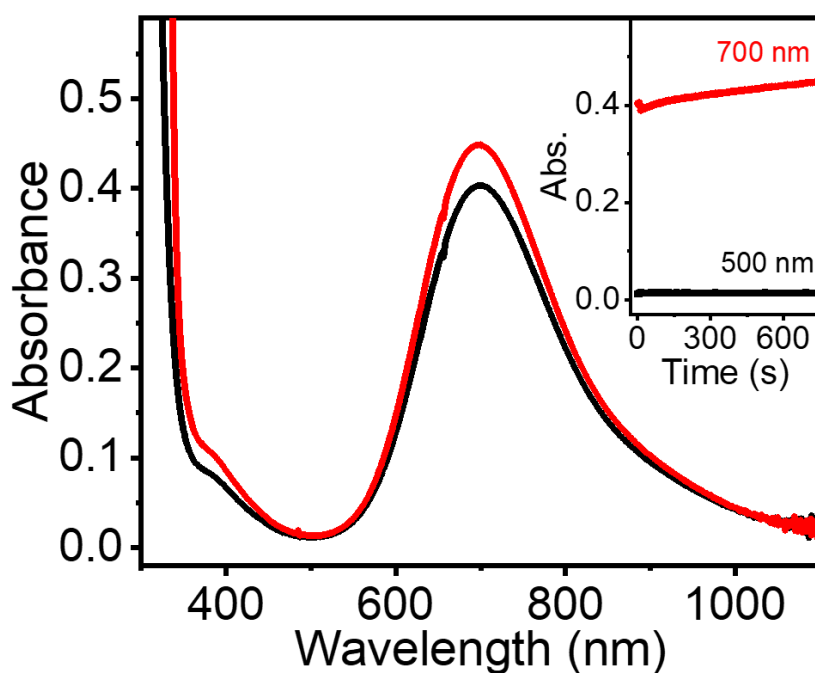

**Figure S31:** UV/Vis absorption changes depicting the reaction of 2 mM **2** (black) with 40 eq. of 2-PPA at 40 °C. Inset: The corresponding changes in the absorption at 700 nm and 500 nm over time in seconds. Conditions to generate **2**: 2 mM  $[\text{Cu}^{\text{I}}(\text{NCCH}_3)_4](\text{ClO}_4)$  + 0.5 eq. of mCPBA + 1.5 eq. of (mCBA +  $\text{Et}_3\text{N}$ ) in  $\text{CH}_3\text{CN}$  at 40 °C.



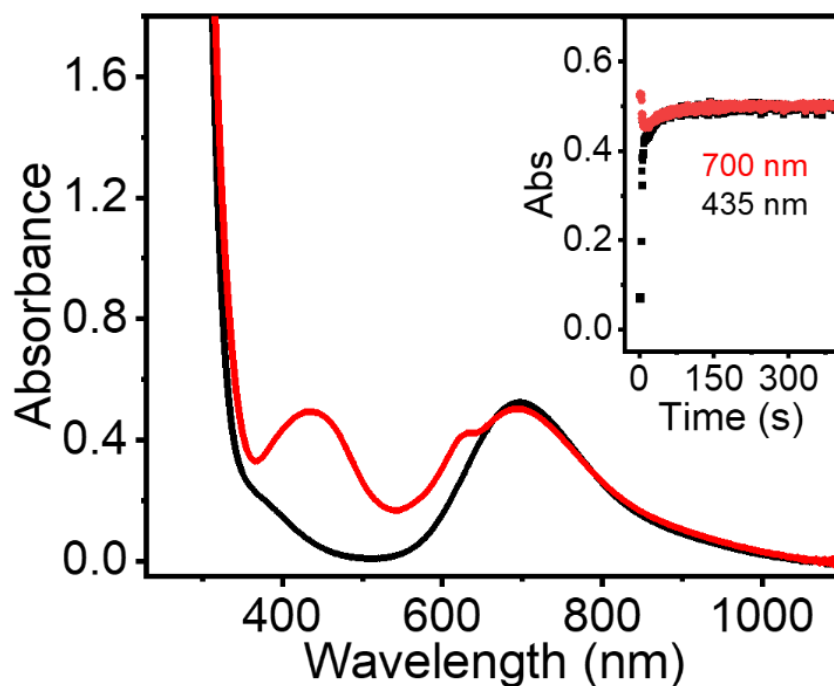

**Figure S32:** UV/Vis absorption changes depicting the reaction of 2 mM **2** with 2 eq. of ferrocene in CH<sub>3</sub>CN. Conditions to generate **2**: 2 mM [Cu'(NCCH<sub>3</sub>)<sub>4</sub>](ClO<sub>4</sub>) + 0.5 eq. of mCPBA + 1.5 eq. of (mCBA + Et<sub>3</sub>N) in CH<sub>3</sub>CN at 25 °C.

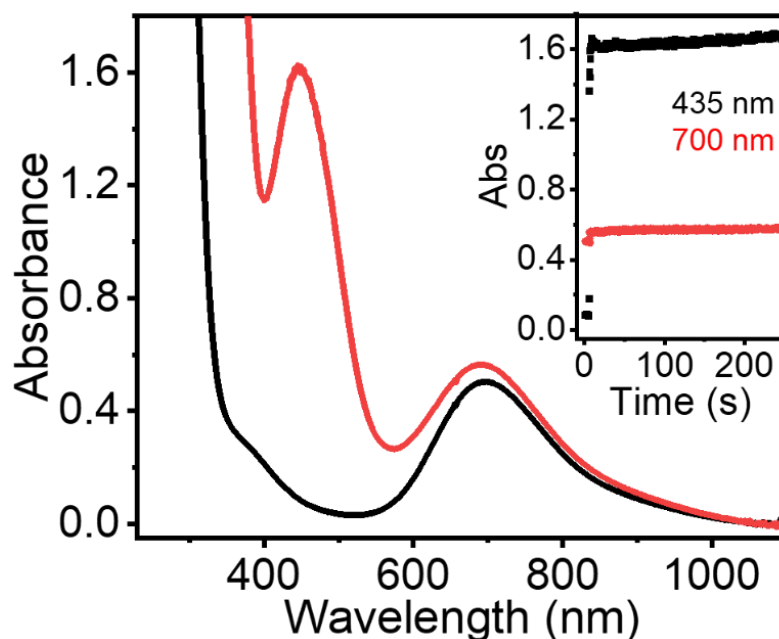

**Figure S33:** UV/Vis absorption changes depicting the reaction of 2 mM **2** with 2 eq. of acetylferrocene in CH<sub>3</sub>CN. Conditions to generate **2**: 2 mM [Cu'(NCCH<sub>3</sub>)<sub>4</sub>](ClO<sub>4</sub>) + 0.5 eq. of mCPBA + 1.5 eq. of (mCBA + Et<sub>3</sub>N) in CH<sub>3</sub>CN at 25 °C.

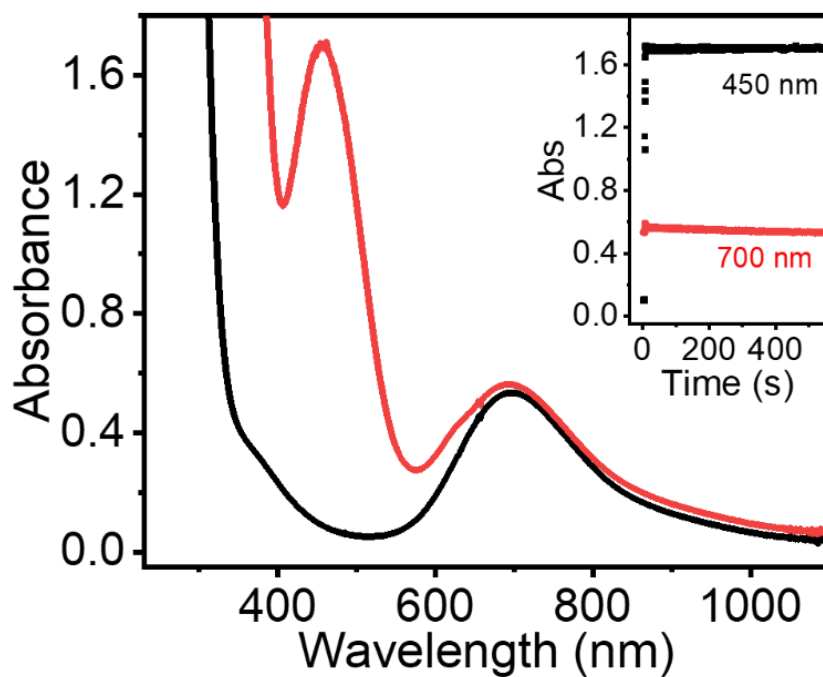

**Figure S34:** UV/Vis absorption changes depicting the reaction of 2 mM of **2** with 2 eq. of diacetyl ferrocene in  $\text{CH}_3\text{CN}$ . Conditions to generate **2**: 2 mM  $[\text{Cu}^{\text{I}}(\text{NCCH}_3)_4](\text{ClO}_4)$  + 0.5 eq. of *m*CPBA + 1.5 eq. of (*m*CBA +  $\text{Et}_3\text{N}$ ) in  $\text{CH}_3\text{CN}$  at 25 °C.

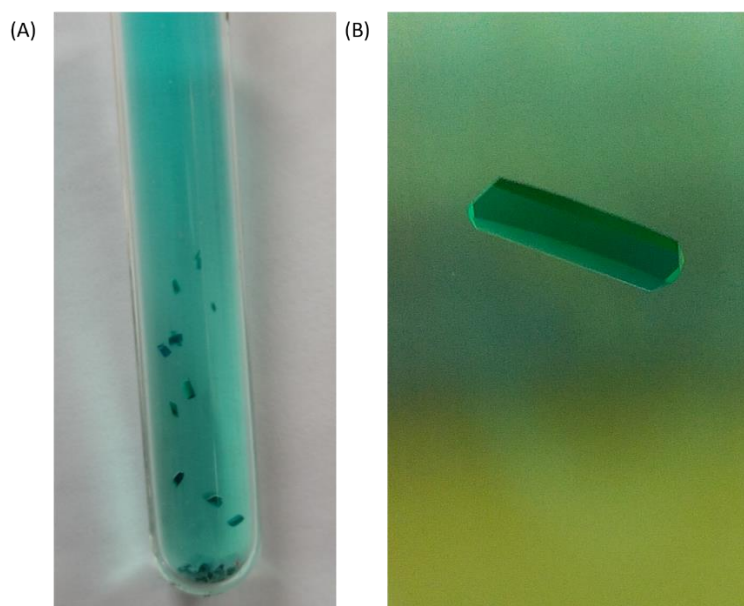

**Figure S35:** (A) Crystals of **2** formed by layering of hexane upon **1** in  $\text{CH}_3\text{CN}$  and (B) magnified view of a selected crystal.

**Table S1:** Crystal data and structure refinement of **2**.

|                                                              |                                                                                 |
|--------------------------------------------------------------|---------------------------------------------------------------------------------|
| Empirical formula                                            | C <sub>20</sub> H <sub>17</sub> Cl <sub>2</sub> CuN <sub>3</sub> O <sub>4</sub> |
| Formula weight                                               | 497.80                                                                          |
| Temperature/K                                                | 100                                                                             |
| Crystal system                                               | triclinic                                                                       |
| Space group                                                  | <i>P</i> -1                                                                     |
| <i>a</i> /Å                                                  | 10.1316(3)                                                                      |
| <i>b</i> /Å                                                  | 10.7203(3)                                                                      |
| <i>c</i> /Å                                                  | 11.9188(3)                                                                      |
| $\alpha$ /°                                                  | 68.1470(10)                                                                     |
| $\beta$ /°                                                   | 68.4210(10)                                                                     |
| $\gamma$ /°                                                  | 86.3640(10)                                                                     |
| Volume/Å <sup>3</sup>                                        | 1113.25(5)                                                                      |
| <i>Z</i>                                                     | 2                                                                               |
| $\rho_{calc}$ /cm <sup>3</sup>                               | 1.485                                                                           |
| $\mu$ /mm <sup>-1</sup>                                      | 1.251                                                                           |
| F(000)                                                       | 506.0                                                                           |
| Crystal size/mm <sup>3</sup>                                 | 0.22 × 0.22 × 0.2                                                               |
| Radiation                                                    | MoK $\alpha$ ( $\lambda$ = 0.71073)                                             |
| 2 $\theta$ range for data collection/°                       | 5.426 to 56.706                                                                 |
| Index ranges                                                 | -13 ≤ <i>h</i> ≤ 13, -14 ≤ <i>k</i> ≤ 14, -15 ≤ <i>l</i> ≤ 15                   |
| Reflections collected                                        | 18162                                                                           |
| Independent reflections                                      | 5560 [ <i>R</i> <sub>int</sub> = 0.0283, <i>R</i> <sub>sigma</sub> = 0.0287]    |
| Data/restraints/parameters                                   | 5560/0/293                                                                      |
| Goodness-of-fit on F <sup>2</sup>                            | 1.080                                                                           |
| Final <i>R</i> indexes [ <i>I</i> ≥ 2 $\sigma$ ( <i>I</i> )] | <i>R</i> <sub>1</sub> = 0.0261, <i>wR</i> <sub>2</sub> = 0.0658                 |
| Final <i>R</i> indexes [all data]                            | <i>R</i> <sub>1</sub> = 0.0287, <i>wR</i> <sub>2</sub> = 0.0674                 |
| Largest diff. peak/hole / e Å <sup>-3</sup>                  | 0.52/-0.46                                                                      |

**Table S2:** Selected Bond lengths (Å) of **2**.

|                                                  | Length/Å   |                                 | Length/Å   |
|--------------------------------------------------|------------|---------------------------------|------------|
| Cu <sub>1</sub> ••••Cu <sub>1</sub> <sup>1</sup> | 2.6483(3)  | Cu <sub>1</sub> —O <sub>3</sub> | 1.9583(10) |
| Cu <sub>1</sub> —O <sub>2</sub> <sup>1</sup>     | 1.9716(11) | Cu <sub>1</sub> —O <sub>1</sub> | 1.9657(10) |
| Cu <sub>1</sub> —O <sub>4</sub> <sup>1</sup>     | 1.9706(10) | Cu <sub>1</sub> —N <sub>1</sub> | 2.1675(13) |

<sup>1</sup>1-X,1-Y,-Z

**Table S3:** Selected Bond Angles (Å) of **2**.

|                                                                            | Angle/°  |                                                               | Angle/°   |
|----------------------------------------------------------------------------|----------|---------------------------------------------------------------|-----------|
| O <sub>2</sub> <sup>1</sup> —Cu <sub>1</sub> —Cu <sub>1</sub> <sup>1</sup> | 83.18(3) | O <sub>3</sub> —Cu <sub>1</sub> —O <sub>4</sub> <sup>1</sup>  | 168.19(4) |
| O <sub>2</sub> <sup>1</sup> —Cu <sub>1</sub> —N <sub>1</sub>               | 93.74(5) | O <sub>1</sub> —Cu <sub>1</sub> —O <sub>2</sub> <sup>1</sup>  | 168.33(4) |
| O <sub>4</sub> <sup>1</sup> —Cu <sub>1</sub> —Cu <sub>1</sub> <sup>1</sup> | 86.62(3) | N <sub>1</sub> —Cu <sub>1</sub> —Cu <sub>1</sub> <sup>1</sup> | 175.13(4) |
| O <sub>4</sub> <sup>1</sup> —Cu <sub>1</sub> —O <sub>2</sub> <sup>1</sup>  | 89.37(5) | O <sub>1</sub> —Cu <sub>1</sub> —O <sub>4</sub> <sup>1</sup>  | 89.23(5)  |
| O <sub>4</sub> <sup>1</sup> —Cu <sub>1</sub> —N <sub>1</sub>               | 97.14(5) | O <sub>1</sub> —Cu <sub>1</sub> —N <sub>1</sub>               | 97.93(5)  |
| O <sub>3</sub> —Cu <sub>1</sub> —Cu <sub>1</sub> <sup>1</sup>              | 81.66(3) | O <sub>3</sub> —Cu <sub>1</sub> —N <sub>1</sub>               | 94.64(5)  |
| O <sub>3</sub> —Cu <sub>1</sub> —O <sub>2</sub> <sup>1</sup>               | 90.66(5) | O <sub>1</sub> —Cu <sub>1</sub> —Cu <sub>1</sub> <sup>1</sup> | 85.17(3)  |
| O <sub>3</sub> —Cu <sub>1</sub> —O <sub>1</sub>                            | 88.35(5) |                                                               |           |

<sup>1</sup>X,1-Y,-Z**Table S4:** Kinetic data for aldehyde deformylation of 2-phenylpropanaldehyde (2-PPA) with various 3d-metal based high valent intermediates at various temperatures.

| Complex                                                                                     | k <sub>2</sub> [M <sup>-1</sup> s <sup>-1</sup> ] (T [°C]) | Reference |
|---------------------------------------------------------------------------------------------|------------------------------------------------------------|-----------|
| <b>1</b>                                                                                    | 0.0515 (40)                                                | This work |
| [Mn <sup>III</sup> (O <sub>2</sub> )(12-TMC)] <sup>+</sup>                                  | 0.04 (20)                                                  | 1         |
| [Mn <sup>III</sup> (O <sub>2</sub> )(13-TMC)] <sup>+</sup>                                  | 0.03 (20)                                                  | 1         |
| [Mn <sup>III</sup> (O <sub>2</sub> )(14-TMC)] <sup>+</sup>                                  | 0.04 (20)                                                  | 1         |
| [Mn <sup>III</sup> (O <sub>2</sub> )(Pro3Py)] <sup>+</sup>                                  | 0.003 (0)                                                  | 2         |
| [Mn <sup>III</sup> (N <sub>3</sub> Py <sub>2</sub> )(O <sub>2</sub> )] <sup>+</sup>         | 0.16 (25)                                                  | 3         |
| (BPMP)Mn <sup>II</sup> Mn <sup>III</sup> -peroxide                                          | 0.0006 (-90)                                               | 4         |
| [Mn <sup>III</sup> (bispidine)(O <sub>2</sub> )] <sup>+</sup>                               | 0.0274 (15)                                                | 5         |
| [Fe <sup>III</sup> (η <sub>2</sub> -OO)(TMC)] <sup>+</sup>                                  | 0.041 (15)                                                 | 6         |
| [Fe <sup>III</sup> (η <sub>1</sub> -OOH)(TMC)] <sup>+</sup>                                 | 0.13 (-40)                                                 | 7         |
| [Co <sup>III</sup> (η <sub>2</sub> -OO)(14-TMC)] <sup>+</sup>                               | 0.058 (0)                                                  | 8         |
| [Co <sup>III</sup> (η <sub>2</sub> -OO)(13-TMC)] <sup>+</sup>                               | 0.015 (25)                                                 | 8         |
| [Co <sup>III</sup> (η <sub>2</sub> -OO)(TMC)] <sup>+</sup>                                  | 0.058 (0)                                                  | 9         |
| [Co <sup>III</sup> (Me <sub>3</sub> -TPADP)(OO <sup>t</sup> Bu) <sub>2</sub> ] <sup>+</sup> | 0.41 (25)                                                  | 10        |
| [Ni <sup>III</sup> (η <sub>2</sub> -OO)(TMC)] <sup>+</sup>                                  | 0.04 (25)                                                  | 11        |
| (L <sub>2</sub> )Ni <sup>II</sup> (superoxido)                                              | 0.00012 (25)                                               | 12        |
| [Ni <sup>III</sup> (TBDAP)(O <sub>2</sub> )] <sup>+</sup>                                   | 0.0074 (25)                                                | 13        |
| [Ni <sup>III</sup> (CHDAP)(O <sub>2</sub> )] <sup>+</sup>                                   | 0.062 (25)                                                 | 13        |
| [Cu <sup>II</sup> (CHDAP)(OOR)] <sup>+</sup>                                                | 0.12 (-40)                                                 | 14        |
| (BPC)Cu <sup>II</sup> (O-O•)                                                                | 0.062 (-80)                                                | 15        |
| [Cu <sup>II</sup> ( <sup>i</sup> Pr <sub>3</sub> -tren)(OOH)] <sup>+</sup>                  | 0.15 (-50)                                                 | 16        |

12-TMC = 1,4,7,10-tetramethyl-1,4,7,10-tetraazacyclododecane, 13-TMC = 1,4,7,10-tetramethyl-1,4,7,10-tetraazacyclotridecane, 14-TMC (or TMC) = 1,4,8,11-tetramethyl-1,4,8,11-tetraazacyclotetradecane, Pro3Py = 1-(pyridin-2-yl)-N-(pyridin-2-ylmethyl)-N-((1-(pyridin-2-ylmethyl)pyrrolidin-2-yl)methyl)methanamine, N<sub>3</sub>Py<sub>2</sub> = N,N'-dimethyl-N-(2-(methyl(pyridin-2-ylmethyl)amino)ethyl)-N'-(pyridin-2-ylmethyl)ethane-1,2-diamine, HBPMP = 2,6-bis[[(bis(2-pyridylmethyl)amino)methyl]-4-methylphenol], bispidine = dimethyl 2,4-di(2-pyridyl)-3-benzyl-7-(pyridin-2-ylmethyl)-3,7-diazabicyclo[3.3.1] nonan-9-one-1,5-dicarboxylate, Me<sub>3</sub>-TPADP = 3,6,9-trimethyl-3,6,9-triaza-1 (2,6)-pyridinacyclodecaphane, L<sub>2</sub> = MeN-(C(=O)NAr)<sub>2</sub>; Ar=2,6-<sup>i</sup>Pr<sub>2</sub>C<sub>6</sub>H<sub>3</sub>, TBDAP

= *N,N'*-di-*tert*-butyl-2,11-diaza[3.3](2,6)pyridinophane, CHDAP = *N,N'*-dicyclohexyl-2,11-diaza[3.3](2,6)pyridinophane, H<sub>2</sub>BPC = *N,N'*-bis(2,6-diisopropylphenyl)-2,6-pyridinedicarboxamide, 'Pr<sub>3</sub>-tren = tris[2-(isopropylamino)ethyl]amine.

## References:

- 1 H. Kang, J. Cho, K. Bin Cho, T. Nomura, T. Ogura and W. Nam, *Chem. - A Eur. J.*, 2013, **19**, 14119–14125.
- 2 J. Du, D. Xu, C. Zhang, C. Xia, Y. Wang and W. Sun, *Dalt. Trans.*, 2016, **45**, 10131–10135.
- 3 D. D. Narulkar, A. Ansari, A. K. Vardhaman, S. S. Harmalkar, G. Lingamallu, V. M. Dhavale, M. Sankaralingam, S. Das, P. Kumar and S. N. Dhuri, *Dalt. Trans.*, 2021, **50**, 2824–2831.
- 4 A. M. Magherusan, S. Kal, D. N. Nelis, L. M. Doyle, E. R. Farquhar, L. Que and A. R. Mcdonald, *Angew. Chemie - Int. Ed.*, 2019, **58**, 5718–5722.
- 5 P. Barman, P. Upadhyay, A. S. Faponle, J. Kumar, S. S. Nag, D. Kumar, C. V. Sastri and S. P. de Visser, *Angew. Chemie - Int. Ed.*, 2016, **55**, 11091–11095.
- 6 J. Annaraj, Y. Suh, M. S. Seo, S. O. Kim and W. Nam, *Chem. Commun.*, 2005, 4529–4531.
- 7 J. Cho, S. Jeon, S. A. Wilson, L. V. Liu, E. A. Kang, J. J. Braymer, M. H. Lim, B. Hedman, K. O. Hodgson, J. S. Valentine, E. I. Solomon and W. Nam, *Nature*, 2011, **478**, 502–505.
- 8 Y. Jo, J. Annaraj, M. S. Seo, Y. M. Lee, S. Y. Kim, J. Cho and W. Nam, *J. Inorg. Biochem.*, 2008, **102**, 2155–2159.
- 9 Y. Jo, J. Annaraj, M. S. Seo, Y. M. Lee, S. Y. Kim, J. Cho and W. Nam, *J. Inorg. Biochem.*, 2008, **102**, 2155–2159.
- 10 B. Shin, Y. Park, D. Jeong and J. Cho, *Chem. Commun.*, 2020, **56**, 9449–9452.
- 11 J. Cho, R. Sarangi, J. Annaraj, S. Y. Kim, M. Kubo, T. Ogura, E. I. Solomon and W. Nam, *Nat. Chem.*, 2009, **1**, 568–572.
- 12 C. Panda, A. Chandra, T. Corona, E. Andris, B. Pandey, S. Garai, N. Lindenmaier, K. Silvio, E. R. Farquhar, J. Roithov, G. Rajaraman, M. Driess and K. Ray, *Angew. Chemie Int. Ed.*, 2018, **57**, 14883–14887.
- 13 J. Kim, B. Shin, H. Kim, J. Lee, J. Kang, S. Yanagisawa, T. Ogura, H. Masuda, T. Ozawa and J. Cho, *Inorg. Chem.*, 2015, **54**, 6176–6183.
- 14 B. Kim, D. Jeong and J. Cho, *ChemComm*, 2017, **53**, 9328–9331.
- 15 P. Pirovano, A. M. Magherusan, C. Mcglynn, A. Ure, A. Lynes and A. R. Mcdonald, *Angew. Chemie Int. Ed.*, 2014, **53**, 5946–5950.
- 16 B. Kim, D. Jeong, T. Ohta and J. Cho, *Commun. Chem.*, 2019, **2**, 1–6.
